# Supplementary material for: β-tricalcium phosphate synthesized in organic medium for controlled release drug delivery application in bio-scaffolds
Source: Royal Society of Chemistry journal article supplement (doi:10.1039/d3ra04904c), 2023-01-01
Supplement: d3ra04904c1.pdf [file d3ra04904c1.pdf]

## $\beta$ -tricalcium phosphate for control release drug delivery application in bio-scaffold

*Md. Sahadat Hossain<sup>a</sup>, Md. Aftab Ali Shaikh<sup>a,c</sup>, Md. Najem Uddin<sup>b</sup>, Muhammad Shahriar Bashar<sup>d</sup>, Samina Ahmed<sup>\*a,b</sup>*

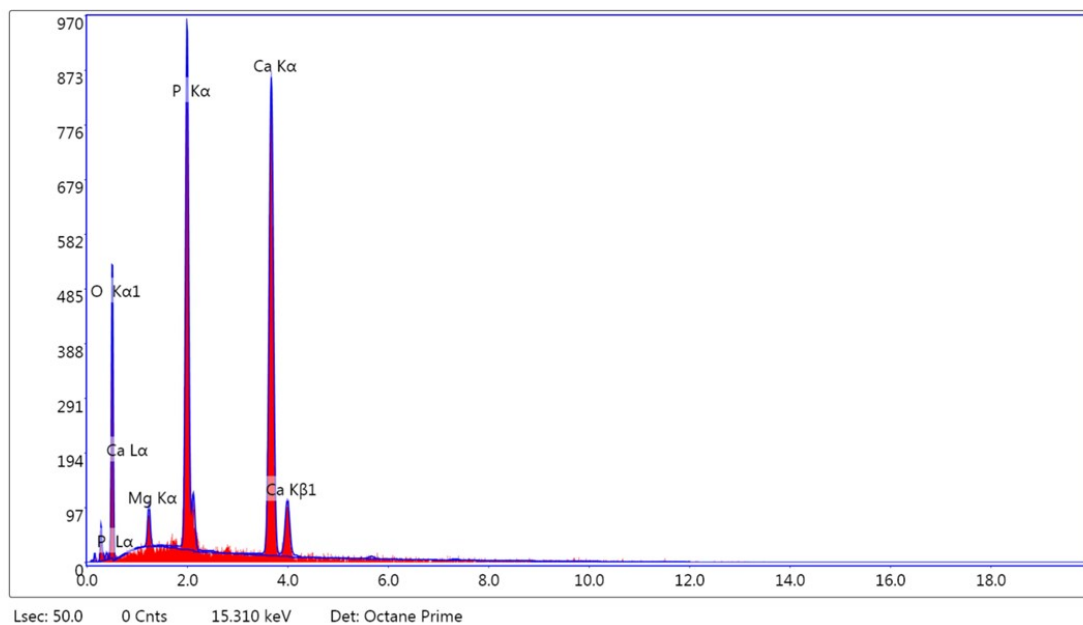

Figure S\_1: Pictorial view of elemental analysis by EDX for drug loaded sample

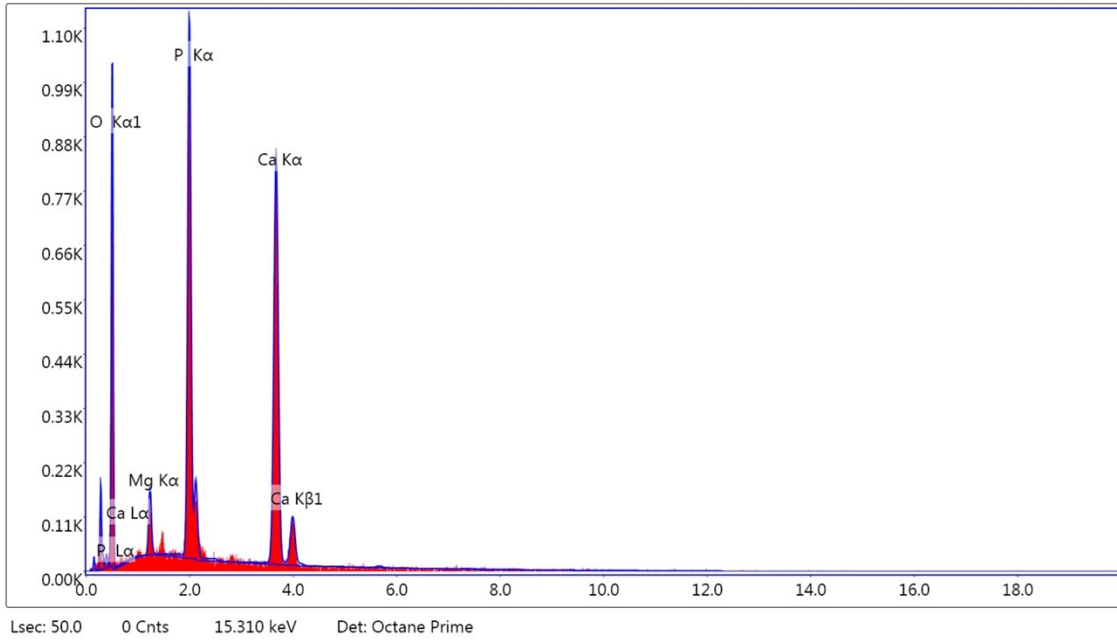

Figure S\_2: Pictorial view of elemental analysis by EDX after drug release

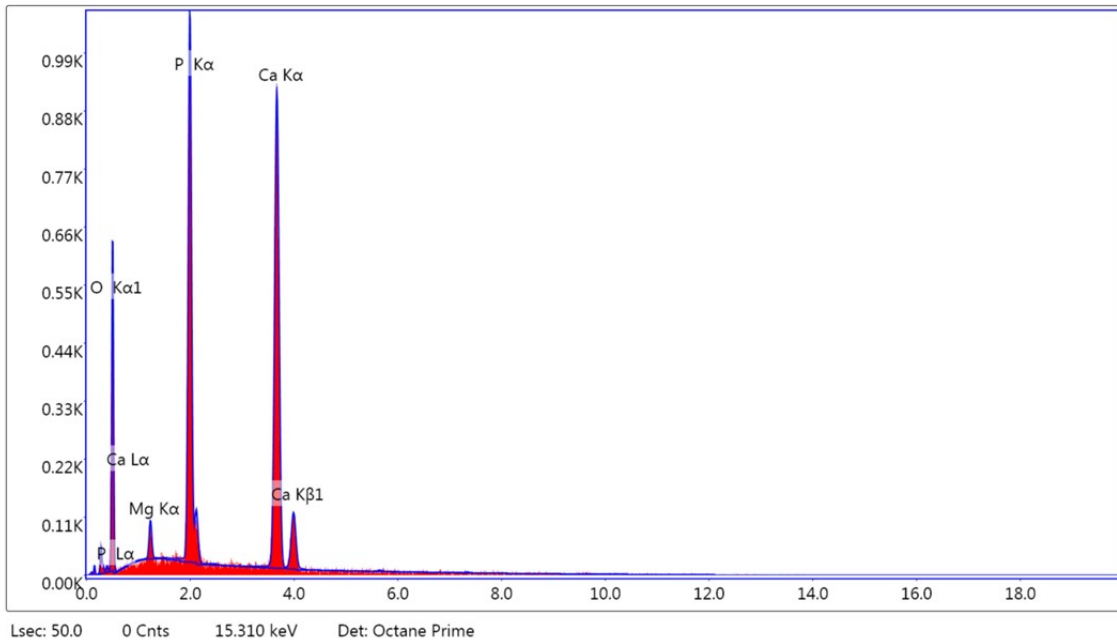

Figure S\_3: Pictorial view of elemental analysis by EDX after immersion in SBF solution
